# Supplementary material for: 3D host cell and pathogen-based bioassay development for testing anti-tuberculosis (TB) drug response and modeling immunodeficiency
Source: publisher site journal article supplement (doi:10.1515/bmc-2021-0013), 2021-01-01
Supplement: Supplementary file 1 [file bmc-2021-0013_SM.pdf]

## Supplementary Material

## Open Access

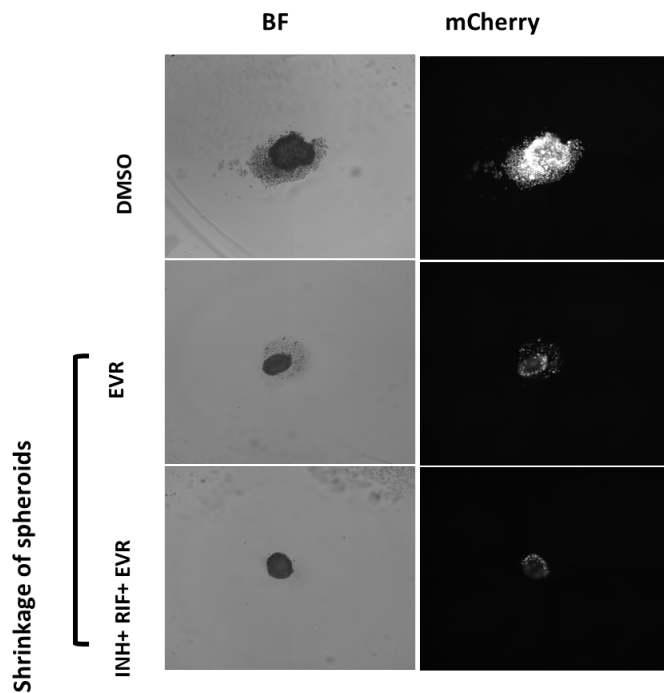

**Supplementary Figure S1:** Size of spheroids with Everolimus treatment. Representative images of spheroids treated with DMSO (0.5% v/v), EVR (1 nM) and a combination of INH, RIF and EVR (0.625  $\mu$ M INH, 0.195  $\mu$ M RIF and 1 nM EVR).

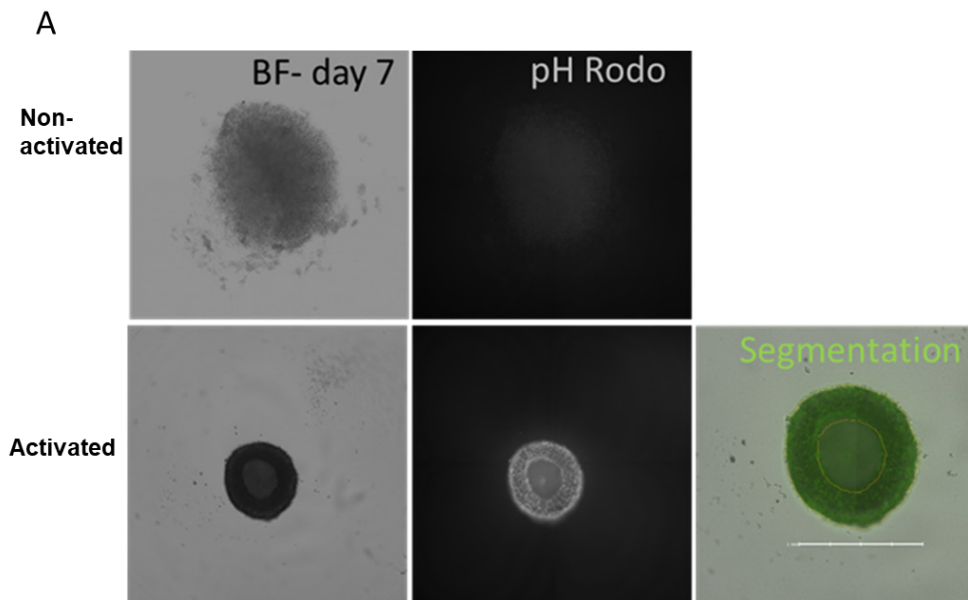

**Supplementary Figure S2:** pH validation in spheroids with and without activation. pHRhodo probe staining of spheroids with/without PMA treatment on day 7 time point in the culture.
